# Supplementary material for: Experimental phase diagram and its temporal evolution for submicron 2-methylglutaric acid and ammonium sulfate aerosol particles
Source: Royal Society of Chemistry journal article supplement (doi:10.1039/d3cp04411d), 2023-11-29
Supplement: d3cp04411d1.pdf [file d3cp04411d1.pdf]

**Supporting information for**

**Experimental Phase Diagram and Its Temporal Evolution for Submicron  
2-Methylglutaric Acid and Ammonium Sulfate Aerosol Particles**

Qishen Huang, Kiran R. Pitta, Kayla Constantini, Emily-Jean E. Ott, Andreas Zuend, Miriam  
Arak Freedman\*

**Summary:** The content of this supporting information includes the size distribution of submicron 2MGA+AS particles, example optical images of micrometer droplets at different RH values, the measured ERH of submicron inorganic aerosol particles and literature values (KCl, K<sub>2</sub>SO<sub>4</sub>), and the AIOMFAC prediction of the viscosity of 2MGA+AS aerosols.

## Experimental Methods

### Supplementary Figures and Tables

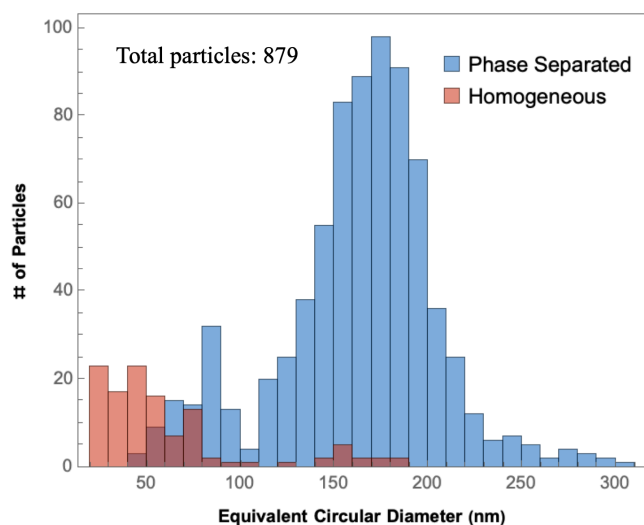

Figure S1. Size distribution of 2MGA+AS aerosols ( $mf_d(AS) = 0.33$ ). The images were collected using a diffusion dryer coupled with cryo-TEM. LLPS is inhibited for particles smaller than 30 nm.

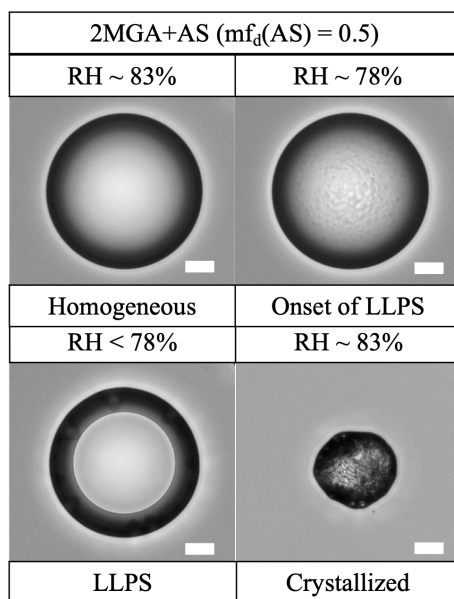

Figure S2. Example optical images of micrometer droplets ( $mf_d(AS) = 0.5$ ), at different RH conditions. The labels under the images denote different phase states of droplets. Scale bar = 2  $\mu\text{m}$ .

Table S1. The ERH of KCl and K<sub>2</sub>SO<sub>4</sub> measured in this study experimentally and measured in the literature by Morris et al.<sup>1</sup> The temperature of this study was 297 ± 1 K, which is overall consistent with Morris et al with variation in temperature about 1K.

| Composition                    | Experimental ERH (%) | Literature value(%) |
|--------------------------------|----------------------|---------------------|
| KCl                            | 56 ± 1               | 56 ± 2              |
| K <sub>2</sub> SO <sub>4</sub> | 59 ± 1               | 60 ± 1              |

Table S2. The estimated viscosity of 2MGA+AS aerosol particles with various compositions at ~78% RH and 298K. The 78% RH is close to the SRH of micrometer-sized 2MGA+AS aerosol particles.

| mf <sub>d</sub> (AS) | RH    | log <sub>10</sub> ( η(Pa · S)) |
|----------------------|-------|--------------------------------|
| 0.10                 | 78.33 | -1.612                         |
| 0.20                 | 78.29 | -1.811                         |
| 0.33                 | 78.50 | -2.014                         |
| 0.50                 | 78.68 | -2.172                         |
| 0.80                 | 78.50 | -2.385                         |
| 0.90                 | 78.34 | -2.470                         |

#### References:

- 1 H. S. Morris, A. D. Estillore, O. Laskina, V. H. Grassian and A. V. Tivanski, *Anal. Chem.*, 2016, **88**, 3647–3654.
